# Supplementary material for: Ultrasound-Assisted Mineralization of 2,4-Dinitrotoluene in Industrial Wastewater Using Persulfate Coupled with Semiconductors
Source: MDPI journal article supplement (doi:10.3390/molecules28114351), 2023-05-25
Supplement: s1 [file s1]

## Supplementary Figure

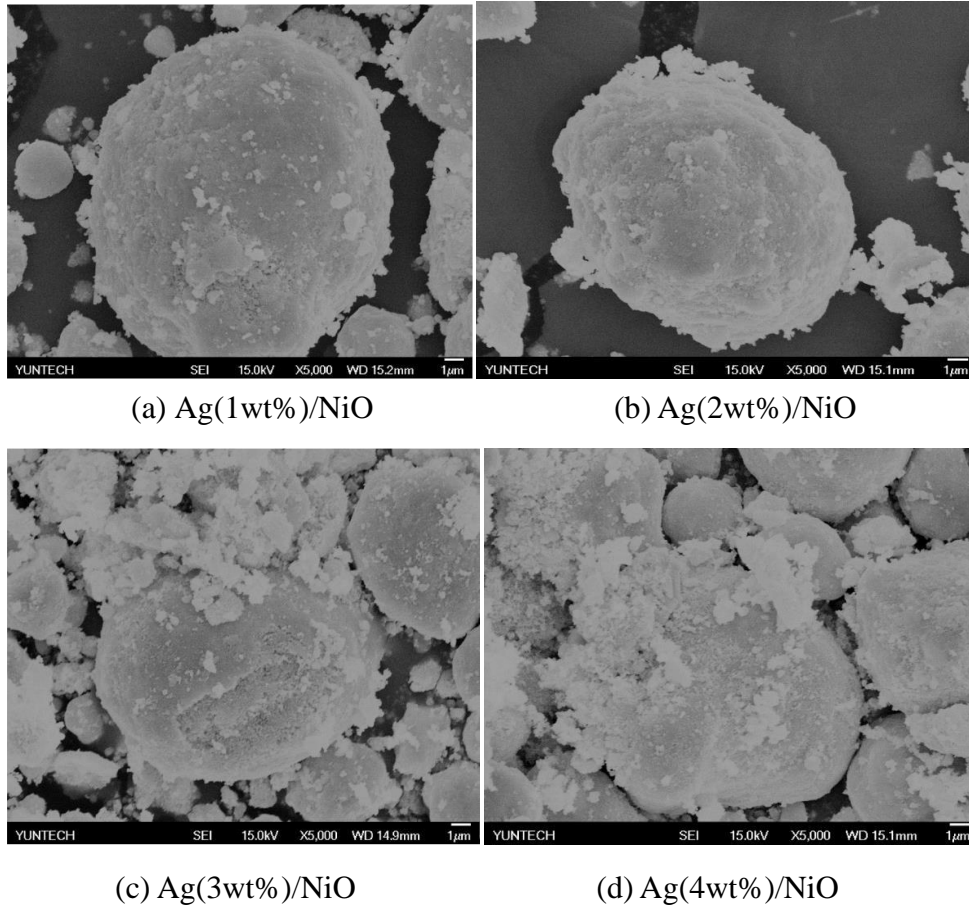

**Figure S1.** FE-SEM images of the (a) Ag(1wt%)/NiO, (b) Ag(2wt%)/NiO, (c) Ag(3wt%)/NiO and (d) Ag(4wt%)/NiO semiconductors.

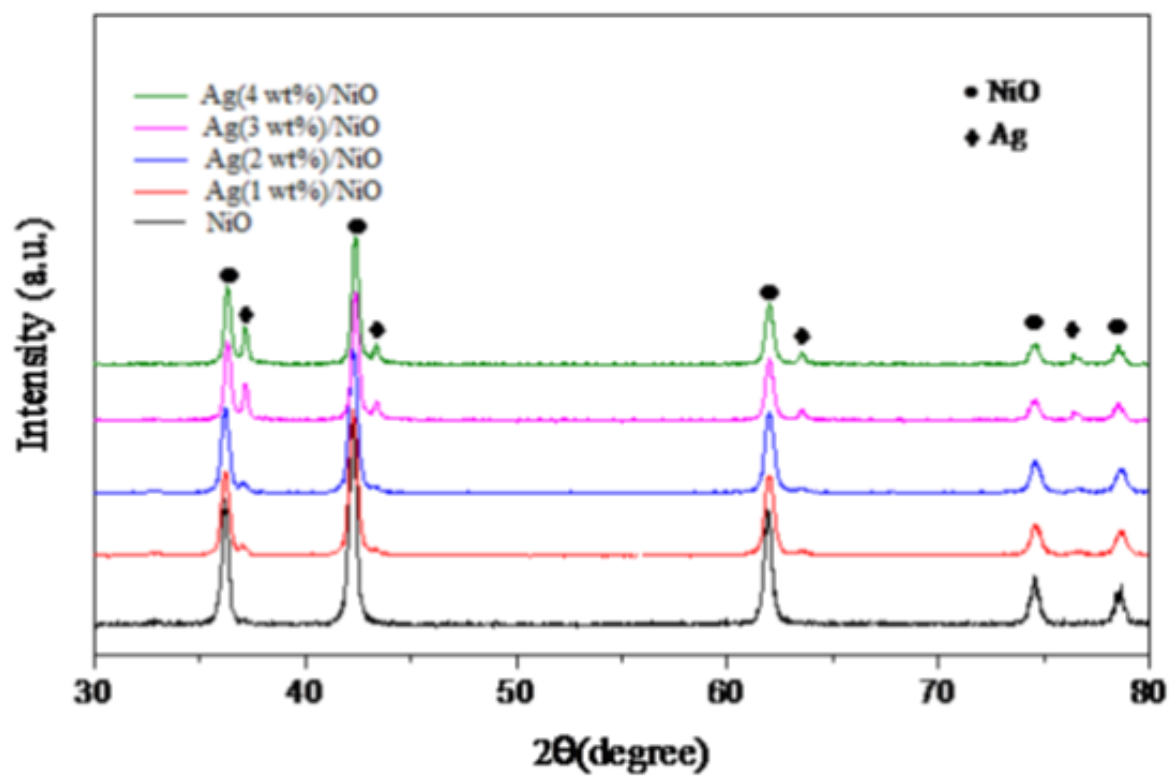

Figure S2. X-ray diffraction patterns of Ag(1wt%)/NiO, Ag(2wt%)/NiO, Ag(3wt%)/NiO and Ag(4wt%)/NiO semiconductors.
